# Supplementary material
Source: Research Square preprint supplement (doi:10.21203/rs.3.rs-10003018/v1)
Supplement: Supplementary file 1 [file 8f97a286710dba8dd685bd58.docx]

# **Supplementary**

Supplementary Table A1 reports the full interaction model underlying the heterogeneity analysis presented in Table 4. Q1, the lowest GDP-per-capita quartile, is the reference category. Income-group dummy variables are omitted in the fixed-effects estimator because they are time-invariant and perfectly collinear with country fixed effects.

**Table A1.** Fixed-Effects Interaction Model by Income Group

| **Variables** | **Coefficient** | **Robust SE** | **p-value** |
| --- | --- | --- | --- |
| Inflation (Q1 poorest) | 0.0090** | 0.0041 | 0.027 |
| Inflation × Q2 Lower-middle | -0.0035 | 0.0055 | 0.526 |
| Inflation × Q3 Upper-middle | 0.0117 | 0.0143 | 0.417 |
| Inflation × Q4 Richest | -0.0483*** | 0.0089 | 0.000 |
| Post-2021 Shock (Q1 poorest) | 0.5726*** | 0.0560 | 0.000 |
| Post-2021 × Q2 Lower-middle | 0.1697** | 0.0710 | 0.018 |
| Post-2021 × Q3 Upper-middle | 0.2390*** | 0.0778 | 0.002 |
| Post-2021 × Q4 Richest | 0.1952** | 0.0826 | 0.019 |
| Log GDP per capita | 0.4219* | 0.2383 | 0.078 |
| Urbanization (%) | 0.0728*** | 0.0184 | 0.000 |
| Log population | 1.3163** | 0.5832 | 0.025 |
| Constant | -25.8499*** | 9.5769 | 0.008 |

| **Model statistics** | **Value** |
| --- | --- |
| Observations | 1,273 |
| Countries | 165 |
| Within R² | 0.776 |
| F-statistic | 120.78*** |
| Country fixed effects | Yes |
| Clustered standard errors | Yes |

Notes: Dependent variable: Cost of a Healthy Diet (cahd_ppp**.** Q1 (poorest countries) is the reference category. Income-group dummy variables are omitted in the fixed-effects estimator because they are time-invariant and perfectly collinear with country fixed effects. Standard errors are clustered at the country’s level. *, ** and *** denote significance at the 10%, 5%, and 1% levels, respectively.

Table A1 reports the full interaction model underlying the heterogeneity analysis presented in Table 5. Because country fixed effects absorb all time-invariant characteristics, the income-group dummy variables are omitted from the estimation. The interaction terms therefore capture how the effects of inflation and the post-2021 food-system shock differ relative to the poorest-country group (Q1). The results indicate significant heterogeneity in both relationships. In particular, the inflation effect is significantly weaker among the richest countries, whereas the post-2021 shock exerted a significantly larger effect in all higher-income groups compared with the poorest countries.
